# Supplementary material for: Oligo-FISH of Populus simonii Pachytene Chromosomes Improves Karyotyping and Genome Assembly
Source: MDPI journal article supplement (doi:10.3390/ijms24129950), 2023-06-09
Supplement: s1 [file s1]

---

## Oligo-FISH of *Populus simonii* Pachytene Chromosomes Improves Karyotyping and Genome Assembly

### Supplementary Materials

**Supplementary Data S1.** The sequence data of a centromere-specific repeat Ps34.

>Ps34

```
ACCGAGATCTACACAGGCGAAGACACTCTTTCCCTACACGACGCTCGCACAAACTTGGGG
AAGATGTAATCAACGCTGTTAGATCCTTCTTTCAGACTCGTAGAATGCTTAAAGAAACGAATGC
TACATCCATTTATTTTTTTTTTTTTTGGTAAGTTGACGTATGTATTAAGAAGAAGATACAAACAT
TATAAGGGGCATACCCAGATTTACAATGAGAACAGAAACATAAAACAACAGATGGCTACAA
GCTAGCCACCGACCATAAAACTGAAACCTCACTAGATTTCGTTAGGGAAACCAATACAACCAAC
TAACTAACAAATTAAGAATCTATGGTATTCACCCTCCAAGCTTGTTGGATCCTTTTGTTTTCATTT
GTTGGTACGACATTCTCATCAAATCAAGCTTATCACGAATGATATATTCGATTGATTAAAGAC
CAAATTCGAAGTTCTAGACATTCCAGCAAAGATCCTTGCATTCCGTTCTTGCCATACATGATACA
CTGTAGCTGCGAAACTCAGTTTTCGAGAAAAATTGACGAAACTCTTGCCATGCCAAGAGACAGT
GGCCCATCGAATCCATTCATCCCAGCCTTTTGTCAATTCTTGAATGTTCGCATCTGTCACAAACAT
CCCACCAGATCGCTTTAGTATAGGAGCATTCAAAGAACAAGTGGTTGTGATCCTCATTGTTGCG
GAGACAGAGTGAGCATCTATTGGGACCATGTATACCAAACCGATGAAGTTTATCTTGAGTTGTG
AGTTTCTGTTGGACAGCCATCCATAGAAGAAATGAATGTCTTGGAACAGCATTCTTGAACCACA
CAATGTCATGCCATTCAACCATCTGACGATGACCTCTAGTTGTTCCCAAGCTACTTTGATCGAG
AATCTGTGATTTGGCGAATCCAACCAAACTATCTCATCCTTTTGCCCCATCTTAGGATTAGAATT
GGAAGGAATAGCTTCTATAATGGGGTGCCAGCCAATAGCTTGGGTGGTAGGAGTTTTCCATTCT
GAGTTATGAATTAGCACTTTCACCCTCGCGTTCTTGCCCATACCTGAATCATAGATAAATCTTTC
CCCGTAAGAATCCGCGAGTGGGCTGTGAGGATGCCAATTGTCAAACCATAGAGAGGTTGTCATT
CCATCTCCTATGATGTACTTCATCTTCGGCCATGCTAAGGATCTGAGCTTTAGAATCTTCCCCCA
AGCCCAAGAGCAATTCTGTGGCGTCTTGATTGTCCAGAAATTCCTACCTCGCAACAGATTGGAT
CTGATCCAAGTAGACCATATTGAGCCATCTGAGTCATTGCACAGGTTCCAAATGTGTTTCAACA
AAGCAATCTTGTTCCATTCTGTTATCCTTTTTATTCCTAGCCCCCCTCCTTTTTTGGAAGACATAC
CTGATCCCAAGCCACTTTAGCCCCAGTAGTTCTCATATCTGAACCTGACCAAAGAAAGGATTTTC
ATAATTTGCTCCACATTTTTAATTACTTGCCCAGGTAAGAGAAAGAGAGATGCCCAATAGACCT
GTATGGAAAATAAGACTGAATTAATCAGTTGTACCCGTCCTGCATACGAGAGTGTTCTACAAGT
CCAATGTCGAACCTTTAGAGGTGATTTCGATCCACGAGGCCCTTACAATAAACAGCCTTTAGTCTG
GACGAGAGAAGAGGAACTCCCAAATATTTCATAGGGAGCTCCCCCTCTCTAAACCCAAGAATA
TGAATAATTTGTTCCCTCTCAGCATTTAACACACCGCTCAAGAAGATGTCACCTTTTGTTTGGATT
GGATACAGACCTGATAGGTCTTGAACTTTGTGAGCACAGTTCTGATCATACGAATTGAGTTTA
CATCCCCGTTGCTAAAAATCATCAAGTCGTCAGCAAAACAAAGATGAGAAATTTTGTCTTCTT
GCATCTCCAGTGGAACCTGAATTCTTGGTTGGCACTCATCTTGCAGAATAGCCCCGAAAGGATTT
CCATACATAGGACAAACAAATATGGGGACAATGGATCCCCCTGTCTCAGCCCTCTCCCCCTTG
AAAGTAACCTGCAAGCTCACCATTGACGTTGATAGAGAATTGACATGATGTAACACAAACCAT
```

---

GATCCAATCAATTACTGTTCTAGGGAATCCCATTTTTATTAACACAGCGTCAACGAAATCCCAC  
CGCACCGAGTCGTAAGCCTTCATCAGATCAACTTTCATAGCACAACGAGCAGGTCCCGTAGATT  
TATGATAGCCTTTCATTAGTTCCTGAGACAACAGAATGTTGTCACTGATTCTCCGTCCTGAGATA  
AAAGCAGTCTGATATGGACCAACTAAGGATGGCAAAACAACTTTGATTCTCCCAGCTAGAATCT  
TAGCGATGCATTTGTACACTGTATTGCAGCAAGATATAGGACGAAAATCTGTCAACCTTGTAGG  
ATTAGCAACTTTAGGAATAAGGGAAATGGATGTAGCATTCAATTTCTTTAAGCATTCTACGAGTCT  
GAAAGAAGGATCTAACAGCGTTGATTACATCTTCCCCAACTATGTGCCACATTCTTTTGAAGAA  
ACCTGCGTTAAAGCCATCTGGACCAGGGGCTTTGTTGTTCTTCAAACATAAGCATGCTTAA  
TCTCCTCCCTTGTTACATCTTGTGCGAGTACTTG
